# Supplementary material for: Implementation Barriers and Facilitators of an Integrated Care Initiative Targeting Socioeconomically Vulnerable Groups
Source: Research Square preprint supplement (doi:10.21203/rs.3.rs-5849625/v1), 2025-03-12
Supplement: Supplementary file 1 [file 92d8dce8625de4ca0b8e1780.docx]

**Additional file 1**

Supplementary Table 1: Complete list of identified barriers and facilitators

| **Domain** | **Construct** | **Clinical level** | **Professional level** | **Organisational level** | **System level** |
| --- | --- | --- | --- | --- | --- |
| Innovation | Innovation source |  |  | + Conceived based on personal experience of the initiator |  |
| Innovation evidence-base |  |  | + The intervention is composed of evidence-based components |  |
| Innovation relative advantage | + Authority of general practitioner  + Presence of different disciplines perceived as interesting  + The measurements are appreciated and seen as the primary reason for going to the group consultation | + Peer support  + Authority of general practitioner  + Multidisciplinary design contributes to recognisability and diversity of professionals involved  + Concrete measurements raise participants' awareness and provide immediate guidance for next steps from different professionals  + Low-threshold nature for participation  - Intervention potentially suitable for a narrow group | + More time to talk about participants' needs  + Instant guidance for follow-up steps from different professionals where a warm handoff is achieved | + Equality of professionals and residents, no white coat syndrome |
| Innovation adaptability | + Theme can be adapted to health care needs of target group | + Theme can be adapted to health care needs of target group | + Theme can be adapted to health care needs of target group  + Location and setting can be adapted based on needs |  |
| Innovation trialability |  |  |  |  |
| Innovation complexity |  |  | - Themes of health needs do not always align with funding streams  - Setting makes participants hesitant to share personal data | - Themes of health needs do not always align with funding streams |
| Innovation design | ≈ Key to creating a sense of trust during the group consultation  ≈ Participating in the group consultation should be low threshold  - Dutch language and use of jargon  - The examples do not sufficiently focus on the cultural background of participants  - Participants receive too little guidance in moving to follow-up initiatives | - Dutch language and use of jargon  - The examples do not sufficiently focus on the cultural background of participants  - Insufficient connection to follow-up initiatives (both the flow of participants and feedback from professionals)  - Ideal group size ambiguous  - ‘Group consultation’ is an ambiguous name  - Participation is complicated for employed people because group consultations and follow-up initiatives are only offered during office hours | - Dutch language and use of jargon  - Insufficient connection to follow-up initiatives (both the flow of participants and feedback from professionals)  - Ideal group size ambiguous  - A blueprint of the group consultations is lacking | - Ideal number of professionals relative to group size unclear  - Business operations are missing. There is currently no concept to embed, there must first be a clearly delineated definition of ‘the group consultation’, for which a business model can be developed. Then this needs to be embedded in formal structures |
| Innovation cost |  |  | - The group consultation is expensive | - The group consultation is expensive |
| Outer setting | Critical incidents |  |  |  |  |
| Local attitudes | + The societal view on health  - It is difficult to share private matters in a group; from the cultural background of many residents, these matters must remain private  - Many residents find it important to have separate groups for men and for women. | + The societal view on health  - Residents are looking for a short-term solution when they develop health issues | + The societal view on health | + The societal view on health |
| Local conditions | ≈ People are part of an informal network which influences who they do and do not trust  - Large social distance between residents and professionals reduces trust  - Residents have little confidence in the system  - Residents face many different problems | + Unhealthy population  + There is a gap between supply and demand for social support | + Unhealthy population  + Increased need for welfare initiatives  - Fragmentation of funding  - High workload among professionals | + There is a gap between supply and demand for social support  + There is formal attention to the importance of prevention at the national level  - Lack of formal responsibility for health  - Movable political climate both at the national and municipal level |
| Partnerships and connections |  | ≈ Collaborational networks of professionals | ≈ Collaborational networks of professionals | ≈ Collaborational networks of payers  + A cross-domain payment title |
| Policies and laws |  |  | - Legal demarcation of the medical and social domains for funding | - Legal demarcation of the medical and social domains for funding |
| Financing |  |  | - Due to lack of formal responsibility, parties point to each other for funding | + Availability of temporary budgets  - Structural budgets are not available |
| External pressure |  | + Media coverage of health issues |  | + Attention to the importance of interdisciplinary work  - Lack of financial incentive for prevention |
| Inner setting | Structural characteristics |  | - Aligning different work schedules  - Sick leave of personnel | - High working pressure | - Involved professionals use different ICT tools, thereby challenging communication. |
| Relational connections |  | ≈ Formal and informal networks between professionals in the neighbourhood | ≈ Formal and informal networks between professionals in the neighbourhood |  |
| Communications |  | ≈ A formal and informal network is the prerequisite for low-threshold communication | ≈ A formal and informal network is the prerequisite for low-threshold communication |  |
| Culture |  | ≈ Willingness to change  + Egalitarian relationships between professionals | ≈ Trust and respect |  |
| Tension for change |  | + Many relapses frustrate professionals |  |  |
| Compatibility |  |  |  |  |
| Relative priority |  |  |  |  |
| Incentive systems |  |  |  |  |
| Mission alignment |  |  | + Strong support for the concept of the group consultations |  |
| Available resources | ≈ Important that involved residents are paid for work they provide for the initiative  - Citizens have to decide between joining the group consultation and other responsibilities | ≈ Low-threshold location for the target group  - Money | ≈ Low-threshold location for the target group  + Inkind contributions from welfare organisations  - Money  - Temporary funding brings with it obligations, e.g. conducting research | - Because temporary funding is available, the need to arrange sustainable funding is lacking  - In-kind funding may cease  - Temporary funding brings with it obligations, e.g. conducting research |
| Access to knowledge and information |  |  |  |  |
| Individuals | High-level leaders |  |  | - Dependence on intrinsic motivation of professionals in influential roles | - Dependence on intrinsic motivation of professionals in influential roles  - Reluctance to invest in temporary initiatives  - Health insurers (and other payers) have different views on what is needed |
| Mid-level leaders |  |  | - Professionals have to work against the mainstream current | - Varying views from professionals on the importance of prevention |
| Opinion leaders |  |  |  |  |
| Implementation facilitators |  |  |  |  |
| Implementation leads | + Enthusiasm about the initiator |  | - Roles ambiguous | + Enthusiasm of initiator motivates stakeholders  - Group consultation depends on initiator, embedding is lacking |
| Implementation team members | + Experts by experience perceive contributing to the group consultations as a great way to step outside their current network  + Experts by experience are close to the residents and therefore well equipped to motivate residents | ≈ Importance of (a few) enthusiastic people leading the initiative | + Enthusiasm among professionals about group consultations |  |
| Other implementation support |  |  | + Professional background of volunteers promotes implementation  - Professional expertise of volunteers is not rewarded proportionately |  |
| Innovation deliverers |  | + Enthusiasm among professionals about group consultations | + Enthusiasm among professionals about group consultations |  |
| Innovation recipients | - There is varying motivation to exercise, for example walking  - Little motivation to change own situation | - The target group sets other priorities over exercise and health, especially if they are not yet ‘sick’  - Employed people are not available during office hours |  |  |
| Process | Teaming |  |  |  | ≈ Actively involve the necessary (paying) parties in the implementation process at an early stage |
| Assessing needs | - The group consultations are still too much from the professionals' perspective, important to adapt it to the needs of participants | - Residents are not sufficiently involved in the design of group consultations | - Residents are not sufficiently involved in the design of group consultations |  |
| Assessing context |  |  |  |  |
| Planning | - Need for an annual planning with meetings on various themes |  | - There is a lack of embedding and a long-term vision  - A blueprint and clear roles are lacking | - Not enough thought is given to structured scaling |
| Tailoring strategies |  |  |  |  |
| Engaging |  | - Group consultation lacks awareness among professionals and residents  - Inflow of residents to group consultations is low  - Lack of feedback to professionals reduces engagement | - Inflow of residents to group consultations is low | - Inflow of residents to group consultations is low |
| Doing |  | ≈ Scheduling group consultations ahead  + Continuous adaptation of the intervention based on experience | + The intervention just started and the team gradually learns from the process  - There is a lot of talk but little action | - There is a lot of talk but little action |
| Reflecting and evaluating |  | - There is no structured evaluation on effectiveness and process | ≈ Effectiveness of prevention is difficult to quantify  - There is no structured evaluation on effectiveness and process | ≈ Effectiveness of prevention is difficult to quantify  - Insufficient effectiveness evaluation to generate supporting evidence |
| Adapting |  |  | + Setting of the intervention can be adapted to the target group |  |
